# Supplementary material
Source: PubMed Central journal article supplement (PMC2613747)
Supplement: pp.108.129155_1.pdf [file pp.108.129155_1.pdf]

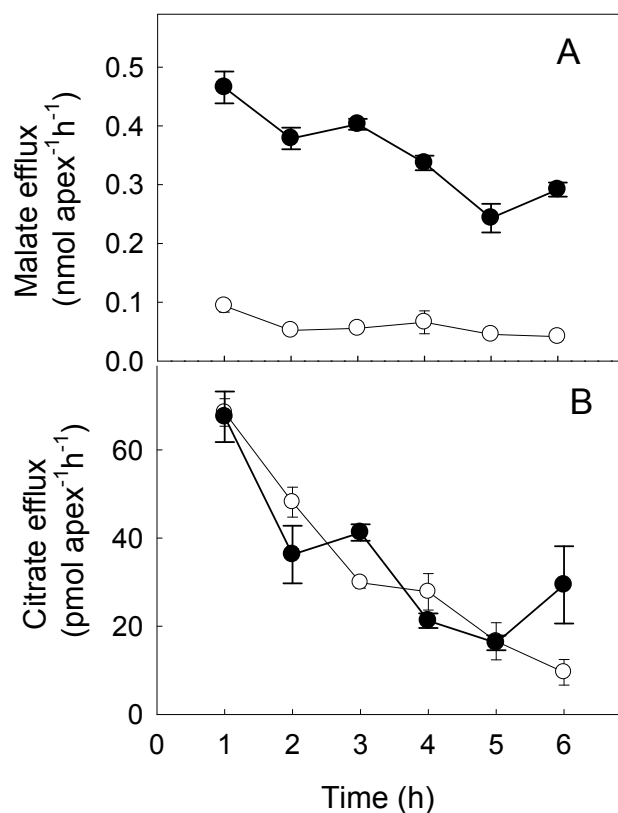

Supplemental Figure 1

**Supplemental Figure 1: Time course of malate and citrate efflux from excised root apices**

Excised root apices from six-day-old seedlings were washed in a glass vial on a shaker with 1 mL of 0.2 mM CaCl<sub>2</sub> (pH 4.3). After washing the solution was replaced with a control solution (○) or a similar solution containing 50 μM AlCl<sub>3</sub> (●). The solutions were replaced every 60 minutes and assayed for malate (A) and citrate (B) efflux assays. Data show the mean and standard error (n=3 to 4).

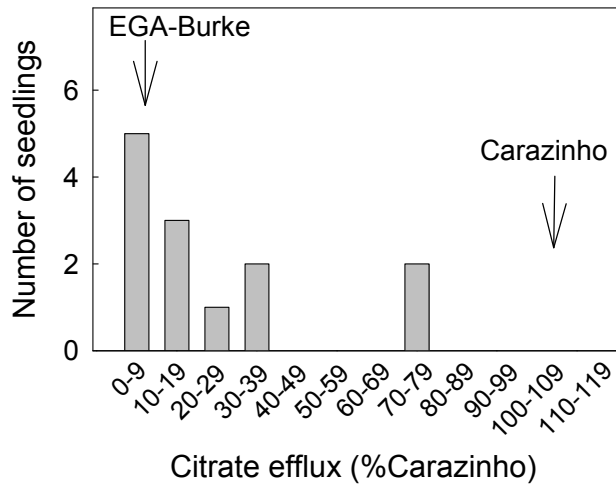

Supplemental Figure 2

**Supplemental Figure 2: Frequency distribution of citrate efflux in BC<sub>1</sub>F<sub>1</sub> seedlings derived from EGA-Burke/Carazinho**

Citrate efflux was measured from the excised root apices of 13 individual BC<sub>1</sub>F<sub>1</sub> seedlings. Data are presented as the percentage of the Carazinho parental line. Mean values for the parental lines are indicated by the arrows.

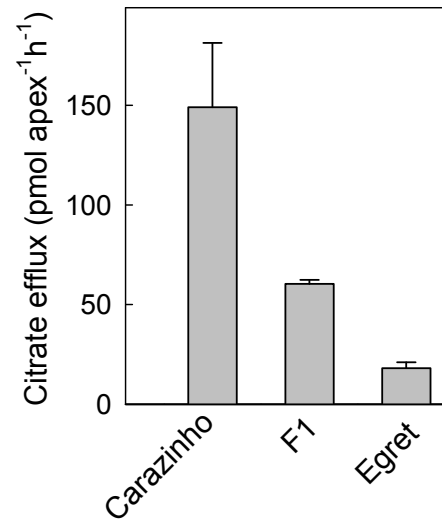

Supplemental Figure 3

**Supplemental Figure 3: Comparison of citrate efflux from Carazinho, Egret and their F<sub>1</sub> progeny**

Citrate efflux was measured from the excised root apices of six-day-old seedlings in the presence of 50  $\mu$ M Al. Data show the mean and standard error (n=3).

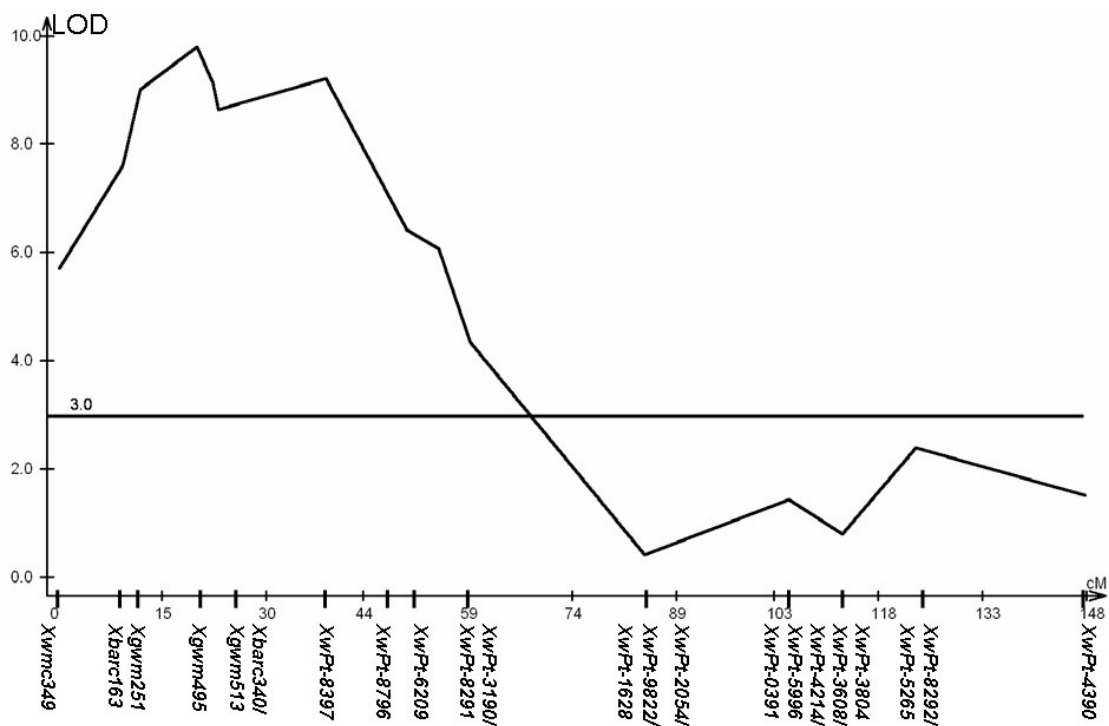

#### Supplemental Figure 4: A major QTL for citrate efflux maps to chromosome 4B

A major quantitative trait locus (QTL) for citrate efflux maps on the chromosome 4B in the F<sub>2</sub> population derived from EGA-Burke/Carazinho. The data plots the mapping distances of markers versus LOD scores (logarithm of the odds). A critical LOD threshold of 3 was used to determine significant association between molecular markers and the citrate efflux phenotype. QTL analysis was performed with Cartographer software version 2.5 (Wang et al 2007; <http://statgen.ncsu.edu/qtlcart/WQTLCart.htm>).

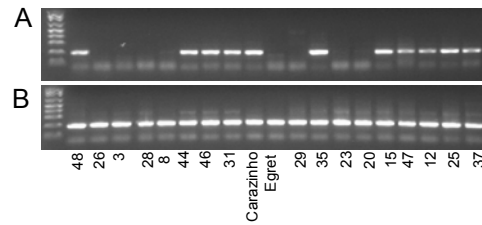

Supplementary Figure 4

**Supplemental Figure 5: Endpoint products from qRT-PCR used to measure *TaMATE1* expression in F<sub>2:3</sub> families derived from Egret/Carazinho**

Data show a subset of the products from the qRT-PCR described in Figure 10 after separation by gel electrophoresis. Numbers identify the families shown Supplemental Figure 1. (A) *TaMATE1* products and (B) *PT-1* (reference gene) products. All samples with undetectable *TaMATE1* expression also showed low citrate efflux.

**Supplemental Table I** Malate and citrate efflux in 50  $\mu$ M AlCl<sub>3</sub> from 45 F<sub>3</sub> families. Data show fluxes from excised root apices and values relative to Carazinho. *TaMATE1* expression is scored as the presence or absence of a band from quantitative RT-PCR reactions.

| Citrate Efflux | F <sub>3</sub> family # or genotype | Citrate efflux pmol/apex/h | Citrate Efflux %Carazinho | Malate Efflux nmol/apex/h | Malate efflux %Carazinho | <i>TaMATE1</i> expression |
|----------------|-------------------------------------|----------------------------|---------------------------|---------------------------|--------------------------|---------------------------|
| Low            | <b>3</b>                            | 1.3                        | 4                         | 2                         | 101                      | no                        |
|                | <b>5</b>                            | 1.5                        | 3                         | 1.3                       | 118                      | no                        |
|                | <b>8</b>                            | 1.8                        | 6                         | 0.65                      | 32                       | no                        |
|                | <b>13</b>                           | 4.3                        | 7                         | 0.28                      | 25                       | no                        |
|                | <b>17</b>                           | 7.0                        | 7                         | 0.39                      | 35                       | no                        |
|                | <b>20</b>                           | 10.0                       | 15                        | 0.08                      | 23                       | no                        |
|                | <b>22</b>                           | 0.8                        | 1                         | 0.84                      | 75                       | no                        |
|                | <b>23</b>                           | 5.5                        | 7                         | 0.29                      | 83                       | no                        |
|                | <b>26</b>                           | 0.0                        | 0                         | 1.5                       | 75                       | no                        |
|                | <b>27</b>                           | 3.0                        | 5                         | 0.29                      | 26                       | no                        |
|                | <b>28</b>                           | 1.8                        | 6                         | 1                         | 50                       | no                        |
|                | <b>29</b>                           | 2.3                        | 4                         | 0.23                      | 26                       | no                        |
|                |                                     | <b>Egret</b>               | 2.3                       | 5                         | 0.2                      | 16                        |
| Med-High       | <b>1</b>                            | 22.9                       | 31                        | 0.07                      | 19                       | yes                       |
|                | <b>2</b>                            | 24.0                       | 46                        | 0.96                      | 113                      | yes                       |
|                | <b>6/7</b>                          | 21.0                       | 36                        | 0.91                      | 82                       | yes                       |
|                | <b>9</b>                            | 27.5                       | 48                        | 0.15                      | 13                       | yes                       |
|                | <b>10</b>                           | 17.8                       | 59                        | 1.38                      | 69                       | yes                       |
|                | <b>11</b>                           | 26.5                       | 51                        | 0.40                      | 48                       | yes                       |
|                | <b>12</b>                           | 18.5                       | 36                        | 0.08                      | 10                       | yes                       |
|                | <b>14</b>                           | 49.0                       | 95                        | 0.74                      | 87                       | yes                       |
|                | <b>15</b>                           | 49.8                       | 96                        | 0.82                      | 113                      | yes                       |
|                | <b>16</b>                           | 38.3                       | 74                        | 0.83                      | 97                       | yes                       |
|                | <b>18</b>                           | 20.0                       | 38                        | 0.65                      | 75                       | yes                       |
|                | <b>19</b>                           | 23.5                       | 44                        | 0.92                      | 108                      | yes                       |
|                | <b>21</b>                           | 15.0                       | 26                        | 0.86                      | 101                      | yes                       |
|                | <b>24</b>                           | 17.5                       | 33                        | 0.74                      | 87                       | yes                       |
|                | <b>25</b>                           | 57.0                       | 76                        | 0.27                      | 79                       | yes                       |
|                | <b>30</b>                           | 61.5                       | 107                       | 0.20                      | 18                       | yes                       |
|                | <b>31</b>                           | 12.3                       | 41                        | 0.80                      | 40                       | yes                       |
|                | <b>32</b>                           | 15.0                       | 22                        | 0.23                      | 26                       | yes                       |
|                | <b>33</b>                           | 35.0                       | 60                        | 1.10                      | 100                      | yes                       |
|                | <b>35</b>                           | 65.0                       | 133                       | 0.35                      | 41                       | yes                       |
|                | <b>36</b>                           | 30.0                       | 40                        | 0.20                      | 57                       | yes                       |
|                | <b>37</b>                           | 39.5                       | 53                        | 0.30                      | 85                       | yes                       |
|                | <b>39</b>                           | 58.0                       | 101                       | 0.16                      | 14                       | yes                       |
|                | <b>40</b>                           | 32.8                       | 57                        | 0.79                      | 71                       | yes                       |
|                | <b>41</b>                           | 11.0                       | 37                        | 0.30                      | 15                       | yes                       |
|                | <b>42</b>                           | 17.5                       | 59                        | 0.47                      | 24                       | yes                       |
|                | <b>43A</b>                          | 14.0                       | 47                        | 1.48                      | 74                       | yes                       |
|                | <b>43B</b>                          | 31.0                       | 41                        | 0.04                      | 11                       | yes                       |
| <b>44</b>      | 18.3                                | 61                         | 0.40                      | 20                        | yes                      |                           |
| <b>45</b>      | 28.3                                | 38                         | 0.29                      | 82                        | yes                      |                           |
| <b>46</b>      | 20.8                                | 69                         | 1.98                      | 99                        | yes                      |                           |
| <b>47</b>      | 49.8                                | 36                         | 0.13                      | 37                        | yes                      |                           |
| <b>48</b>      | 18.0                                | 60                         | 1.47                      | 74                        | yes                      |                           |
